# Supplementary material
Source: PubMed Central journal article supplement (PMC5510549)
Supplement: NIHMS865236-supplement-10549_2017_4230_MOESM1_ESM.pdf [file NIHMS865236-supplement-10549_2017_4230_MOESM1_ESM.pdf]

**Online Resource 1.** European Organization for Research and Treatment of Cancer Quality of Life C30 subscales throughout taxane therapy. Significant detrimental changes in select subscales were associated with taxane therapy. Means  $\pm$  SD (p-value for contrast with timepoint 1)

| Patient-Reported Outcome                  | Timepoint 1     | Timepoint 2             | Timepoint 3             | Timepoint 4             | Timepoint 5             |
|-------------------------------------------|-----------------|-------------------------|-------------------------|-------------------------|-------------------------|
| <b>EORTC QLQ-C30 Functional Subscales</b> |                 |                         |                         |                         |                         |
| Patients Assessed (n)                     | 29              | 27                      | 27                      | 27                      | 28                      |
| Global Health/ QOL                        | 76.8 $\pm$ 16.6 | 70.9 $\pm$ 23.4 (0.1)   | 76.3 $\pm$ 15.4 (0.9)   | 76.1 $\pm$ 13.9 (0.8)   | 80.9 $\pm$ 14.9 (0.3)   |
| Physical Functioning                      | 96.5 $\pm$ 7.0  | 91.8 $\pm$ 10.1 (0.02)* | 90.6 $\pm$ 12.4 (0.02)* | 91.7 $\pm$ 12.1 (0.02)* | 89.9 $\pm$ 16.0 (0.04)* |
| Role Functioning                          | 86.4 $\pm$ 23.5 | 86.7 $\pm$ 23.6 (0.9)   | 87.9 $\pm$ 21.3 (0.6)   | 89.4 $\pm$ 13.3 (0.5)   | 83.5 $\pm$ 27.2 (0.5)   |
| Emotional Functioning                     | 80.4 $\pm$ 20.7 | 81.9 $\pm$ 22.8 (0.7)   | 79.6 $\pm$ 19.6 (0.9)   | 79.2 $\pm$ 18.2 (0.7)   | 86.5 $\pm$ 17.8 (0.1)   |
| Cognitive Functioning                     | 82.8 $\pm$ 18.3 | 83.8 $\pm$ 12.9 (0.7)   | 76.8 $\pm$ 18.4 (0.09)  | 75.2 $\pm$ 22.3 (0.04)* | 82.1 $\pm$ 19.2 (0.9)   |
| Social Functioning                        | 78.6 $\pm$ 22.1 | 77.8 $\pm$ 22.5 (0.9)   | 82.3 $\pm$ 20.8 (0.4)   | 78.3 $\pm$ 19.6 (1)     | 86.8 $\pm$ 17.8 (0.06)  |
| <b>EORTC QLQ-C30 Symptom Subscales</b>    |                 |                         |                         |                         |                         |
| Patients Assessed (n)                     | 29              | 27                      | 27                      | 27                      | 28                      |
| Fatigue                                   | 26.3 $\pm$ 24   | 29.3 $\pm$ 23.9 (0.5)   | 33.5 $\pm$ 23.6 (0.1)   | 30.8 $\pm$ 20.7 (0.3)   | 24.9 $\pm$ 26.5 (0.8)   |
| Nausea/ Vomiting                          | 12.7 $\pm$ 20.9 | 8.1 $\pm$ 12.9 (0.2)    | 9.3 $\pm$ 12.8 (0.3)    | 8.7 $\pm$ 10.6 (0.2)    | 5.2 $\pm$ 9.2 (0.06)    |
| Pain                                      | 9.8 $\pm$ 16.9  | 16.3 $\pm$ 24.3 (0.09)  | 19.6 $\pm$ 25.9 (0.03)* | 12.2 $\pm$ 17.1 (0.6)   | 20.5 $\pm$ 26.7 (0.04)* |
| Dyspnea                                   | 7.6 $\pm$ 17.0  | 15.9 $\pm$ 24.7 (0.02)* | 19.8 $\pm$ 26.7 (0.01)* | 13.7 $\pm$ 18.9 (0.06)  | 3.6 $\pm$ 10.5 (0.3)    |
| Insomnia                                  | 23.8 $\pm$ 30.8 | 30.1 $\pm$ 27.9 (0.3)   | 29.7 $\pm$ 27.2 (0.5)   | 26.8 $\pm$ 25.5 (0.7)   | 27.4 $\pm$ 29.2 (0.6)   |

|                        |             |                   |                   |                     |                    |
|------------------------|-------------|-------------------|-------------------|---------------------|--------------------|
| Appetite Loss          | 18.8 ± 28.9 | 17.1 ± 23.2 (0.7) | 16.2 ± 33.8 (0.7) | 14.3 ± 24.8 (0.3)   | 18.1 ± 27.6 (0.9)  |
| Constipation           | 10.4 ± 18.1 | 8.7 ± 22.1 (0.8)  | 5.7 ± 15.1 (0.3)  | 5.5 ± 12.0 (0.2)    | 6.7 ± 20.2 (0.4)   |
| Diarrhea               | 6.6 ± 13.8  | 11.5 ± 24.4 (0.4) | 15.2 ± 23.2 (0.1) | 15.5 ± 17.2 (0.04)* | 10.1 ± 20.4 (0.4)  |
| Financial Difficulties | 19.3 ± 24.3 | 15 ± 17.4 (0.2)   | 13.6 ± 18.8 (0.3) | 13.4 ± 18.9 (0.1)   | 10.5 ± 18.3 (0.05) |

EORTC QLQ-C30 Functional subscales are on a 0 to 100 scale with higher scores representing higher function

EORTC QLQ-C30 Symptom and mTNS subscales are on a 0 to 100 scale with higher scores representing worse symptoms

\* indicates significant difference from baseline value (p<0.05)
