# Supplementary material
Source: PubMed Central journal article supplement (PMC5510549)
Supplement: NIHMS865236-supplement-10549_2017_4230_MOESM2_ESM.pdf [file NIHMS865236-supplement-10549_2017_4230_MOESM2_ESM.pdf]

**Online Resource 2.** The Modified Total Neuropathy Score (mTNS) outcomes throughout taxane therapy. Values are presented as Mean  $\pm$  SD of the original 0 to 4 scale in addition to the proportion of patients reporting symptoms (i.e., score  $>0$ ), which are presented as 'n (%)'.

| <b>mTNS Subscale</b>        | <b>Timepoint 1</b> | <b>Timepoint 2</b> | <b>Timepoint 3</b> | <b>Timepoint 4</b> | <b>Timepoint 5</b> |
|-----------------------------|--------------------|--------------------|--------------------|--------------------|--------------------|
| Patients Assessed (n)       | 20                 | 18                 | 19                 | 18                 | 19                 |
| Sum of Parameters - mean    | 1.2 $\pm$ 2        | 2.3 $\pm$ 2.8      | 2.3 $\pm$ 2.7      | 2.7 $\pm$ 2.8      | 2.6 $\pm$ 2.2      |
| Score = 0                   | 12 (60%)           | 6 (33%)            | 6 (32%)            | 4 (22%)            | 4 (21%)            |
| Score = 1-2                 | 4 (20%)            | 8 (44%)            | 7 (37%)            | 7 (39%)            | 5 (26%)            |
| Score $\geq$ 3              | 4 (20%)            | 4 (22%)            | 6 (32%)            | 7 (39%)            | 10 (53%)           |
| Sensory Symptoms- mean      | 0.2 $\pm$ 0.4      | 0.6 $\pm$ 0.8      | 0.7 $\pm$ 0.6      | 0.8 $\pm$ 0.6      | 0.8 $\pm$ 0.6      |
| Score $>0$                  | 3 (15%)            | 8 (44%)            | 11 (61%)           | 12 (71%)           | 13 (68%)           |
| Motor Symptoms- mean        | 0.1 $\pm$ 0.4      | 0.2 $\pm$ 0.5      | 0.1 $\pm$ 0.3      | 0.2 $\pm$ 0.7      | 0 $\pm$ 0          |
| Score $>0$                  | 1 (5%)             | 2 (11%)            | 2 (11%)            | 1 (6%)             | 0 (0%)             |
| Autonomic Symptoms- mean    | 0.2 $\pm$ 0.5      | 0.3 $\pm$ 0.6      | 0.2 $\pm$ 0.4      | 0.2 $\pm$ 0.4      | 0.1 $\pm$ 0.2      |
| Score $>0$                  | 2 (10%)            | 5 (28%)            | 4 (22%)            | 3 (18%)            | 1 (5%)             |
| Pin Sensibility             | 0.1 $\pm$ 0.3      | 0.2 $\pm$ 0.5      | 0.2 $\pm$ 0.4      | 0.5 $\pm$ 0.7      | 0.3 $\pm$ 0.6      |
| Score $>0$                  | 2 (10%)            | 2 (11%)            | 3 (17%)            | 6 (35%)            | 5 (26%)            |
| Vibration Sensibility- mean | 0.3 $\pm$ 0.7      | 0.5 $\pm$ 1        | 0.6 $\pm$ 1.1      | 0.6 $\pm$ 0.9      | 0.5 $\pm$ 0.8      |

|                       |           |           |           |           |         |
|-----------------------|-----------|-----------|-----------|-----------|---------|
| Score > 0             | 3 (15%)   | 5 (28%)   | 5 (28%)   | 7 (41%)   | 7 (37%) |
| Strength- mean        | 0 ± 0     | 0.1 ± 0.2 | 0.2 ± 0.5 | 0.1 ± 0.2 | 0 ± 0   |
| Score > 0             | 0 (0%)    | 1 (6%)    | 2 (11%)   | 1 (6%)    | 0 (0%)  |
| Tendon Reflexes- mean | 0.5 ± 1.2 | 0.6 ± 1.1 | 0.3 ± 0.6 | 0.6 ± 1.1 | 1 ± 1.5 |
| Score > 0             | 4 (20%)   | 5 (28%)   | 4 (22%)   | 4 (24%)   | 8 (44%) |

---

mTNS subscales are on a 0 to 4 scale with higher scores representing worse symptoms. No statistical tests are reported for mTNS subscales.
